# Supplementary material
Source: Springer Nature journal article supplement (https://www.springermedizin.de/resource/supplementary/13075_2008_2475_MOESM5_ESM.pdf/9692170)
Supplement: MOESM5 [file 9692170]

| treatment          | rheumatological<br>centers<br>(%) | dermatological<br>centers<br>(%) | p-value  |
|--------------------|-----------------------------------|----------------------------------|----------|
| Corticosteroids    | 48.3 (360/746)                    | 33.4 (217/650)                   | p<0.0001 |
| Immunosuppressants | 45.6 (340/745)                    | 24.5 (159/649)                   | p<0.0001 |
| Cyclophosphamide   | 21.5 (73/340)                     | 23.9 (38/159)                    |          |
| Azathioprine       | 21.8 (74/340)                     | 22.0 (35/159)                    |          |
| Methotrexate       | 35.9 (122/340)                    | 18.9 (30/159)                    | p<0.0001 |
| Chloroquine        | 8.8 (30/340)                      | 3.8 (6/159)                      | p<0.04   |

**Table 2:** Differences between the use of corticosteroid and immunosuppressive therapy between rheumatological and dermatological centers of the DNSS.
